# Supplementary material for: A Validation Study on IDO Immune Biomarkers for Survival Prediction in Non–Small Cell Lung Cancer: Radiation Dose Fractionation Effect in Early-Stage Disease
Source: Oxford University Press journal article supplement (doi:10.1158/1078-0432.ccr-19-1202), 2019-08-30
Supplement: 10780432ccr191202-sup-220504_3_supp_5718132_pwfplt.docx [file 10780432ccr191202-sup-220504_3_supp_5718132_pwfplt.docx]

| **Table S1. Detail of Prospective Clinical Trials.** | | | | |
| --- | --- | --- | --- | --- |
| **Clinical Trials** | **Title** | **Radiotherapy** | **Chemotherapy** | **Patients included in this study** |
| **2003.076 (NCT: NA)** | A Pilot Study to Evaluate the  Impact of Multiple Functional  Images and Molecular  Markers on Radiation  Treatment Planning and  Radiation Outcome and Lung  Toxicity Prediction | Determined by radiation oncologist (EQD2 between  64 and 86 Gy in 30 fractions) | Per treating physician | 8 |
| **2006.040 (NCT00603057)** | Using Functional Image and  Circulating Molecular  Markers to Predict Tumor  Response and Lung Toxicity  in Treatment of Lung Cancer | Determined by radiation oncologist (EQD2 between 60 and 96 Gy in 30 fractions) | Per treating physician | 38 |
| **2007.123 (NCT01190527)** | Using FDG-PET Acquired  During the Course of  Radiation Therapy to  Individualize Adaptive  Radiation Dose Escalation in  Patients with Non-Small Cell  Lung Cancer | 2.1-2.85 Gy per day  ≤17.2% NTCP for normal lung  (EQD2 between 64 and 92 Gy in 30 fractions) | Carboplatin AUC 2 | 6 |
| **GRU 13-24 (NCT: NA)** | Using Functional Image and Circulating Molecular Markers to Predict Tumor Response and Lung Toxicity in Treatment of Lung Cancer | 2.1-2.85 Gy per day  (EQD2 between 60-73.85 Gy) | Carboplatin AUC 2  Paclitaxel 45 mg/m2 | 4 |
| Abbreviations: AUC, area under the (time-concentration) curve; EQD2, equivalent dose in 2 Gy fractions; FDG, fluorodeoxyglucose; NA, not applicable; NCT, National Clinical Trial; NTCP, noninvasive transcutaneous cardiac pacing; PET, positron emission tomography. | | | | |

**Figure S1.** Baseline IDO-associated molecular activity and clinical stages. The panel shows individual and mean activity levels for kynurenine (A) and K:T ratio (B) at baseline in stage I-III NSCLC patients. P-values shown were from independent t-tests. Error bars at figures show 95% confidence interval (CI).

***All P-values were from independent t test.**

**P = 0.938**

**P = 0.468**

**P = 0.002**

**P = 0.806**
